# Supplementary material
Source: PubMed Central journal article supplement (PMC9133061)
Supplement: NIHMS1783761-supplement-supinfo.pdf [file NIHMS1783761-supplement-supinfo.pdf]

**Impact of HIV infection on Survival among Women with Stage I-III Breast Cancer:  
Results from the South African Breast Cancer and HIV Outcomes Study.**

Oluwatosin A. Ayeni, MBChB, PhD; Daniel S. O'Neil, MD, MPH; Yoanna S. Pumpalova, MD; Wenlong Carl Chen, MSc; Sarah Nietz, MD, MMed; Boitumelo Phakathi, MBChB, MMed; Ines Buccimazza, MBChB; Sharon Čačala, MBChB; Laura W. Stopforth, MBChB; Hayley A Farrow, RN; Witness Mapanga, MPH, PhD; Maureen Joffe, PhD; Tobias Chirwa, PhD; Valerie McCormack, PhD; Judith S. Jacobson, MBA, DrPH; Katherine D. Crew, MD, MS; Alfred I. Neugut, MD, PhD; Paul Ruff, MBBCh, MMed; and Herbert Cubasch, MD.

## Table of Contents

|                            |   |
|----------------------------|---|
| Supplementary table 1..... | 3 |
| Supplementary table 2..... | 4 |
| Supplementary table 3..... | 6 |
| Supplementary table 4..... | 7 |

## Supplementary table 1

Treatment of women with breast cancer in the SABCHO cohort by stage and HIV status

|                                                         | Stage I & II Breast cancer |              |             |                  | Stage III Breast cancer |              |            |              |
|---------------------------------------------------------|----------------------------|--------------|-------------|------------------|-------------------------|--------------|------------|--------------|
|                                                         | HIV negative               | HIV Positive | Total       | P value          | HIV negative            | HIV Positive | Total      | P value      |
| Row %                                                   | N=961 (%)                  | N=229 (%)    | N=1190 (%)  |                  | N=907 (%)               | N=270 (%)    | N=1177 (%) |              |
| <b>Surgical treatment</b>                               |                            |              |             |                  |                         |              |            |              |
| No                                                      | 100 (10.4)                 | 32 (14.0)    | 132 (11.1)  | 0.122            | 334 (36.8)              | 105 (38.9)   | 439 (37.3) | 0.538        |
| Yes                                                     | 861 (89.6)                 | 197 (86.0)   | 1058 (88.9) |                  | 573 (63.2)              | 165 (61.1)   | 738 (62.7) |              |
| <b>Chemotherapy treatment</b>                           |                            |              |             |                  |                         |              |            |              |
| No                                                      | 341 (35.5)                 | 55 (24.0)    | 396 (33.3)  | <b>0.001</b>     | 181 (20.2)              | 33 (12.2)    | 214 (18.2) | <b>0.004</b> |
| Yes                                                     | 620 (64.5)                 | 174 (76.0)   | 794 (66.7)  |                  | 726 (80.0)              | 237 (87.8)   | 963 (81.8) |              |
| <b>Radiation therapy</b>                                |                            |              |             |                  |                         |              |            |              |
| No                                                      | 504 (52.4)                 | 127 (55.5)   | 631 (53.0)  | 0.412            | 389 (42.9)              | 121 (44.8)   | 510 (43.3) | 0.575        |
| Yes                                                     | 457 (47.6)                 | 102 (44.5)   | 559 (47.0)  |                  | 518 (57.1)              | 149 (55.2)   | 667 (56.7) |              |
| <b>Treatment received</b>                               |                            |              |             |                  |                         |              |            |              |
| Surgery, no chemotherapy                                | 261 (27.2)                 | 36 (15.7)    | 297 (25.0)  | <b>&lt;0.001</b> | 42 (4.6)                | 4 (1.5)      | 46 (3.9)   | <b>0.006</b> |
| Surgery + chemotherapy                                  | 600 (62.4)                 | 161 (70.3)   | 761 (63.9)  |                  | 531 (58.5)              | 161 (59.6)   | 692 (58.8) |              |
| Chemotherapy, no surgery                                | 20 (2.1)                   | 13 (5.7)     | 33 (2.8)    |                  | 195 (21.5)              | 76 (28.1)    | 271 (23.0) |              |
| No surgery or chemotherapy                              | 80 (8.3)                   | 19 (8.3)     | 99 (8.3)    |                  | (15.3)139               | 29 (10.7)    | 168 (14.3) |              |
| <b>Endocrine therapy (ER+/PR+ patients only, N=866)</b> |                            |              |             |                  |                         |              |            |              |
| No                                                      | 97 (12.2)                  | 32 (17.6)    | 129 (13.2)  | 0.052            | 155 (23.3)              | 49 (24.5)    | 204 (23.6) | 0.720        |
| Yes                                                     | 699 (87.8)                 | 150 (82.4)   | 849 (86.8)  |                  | 511 (76.7)              | 151 (75.5)   | 662 (76.4) |              |

## Supplementary table 2

**Univariate mortality hazard ratios and confidence intervals for risk factors in women with stages I - III breast cancer in the SABCHO cohort.**

|                                   | Alive       |              | Died       |              | HR (95% CI)      | P-value          |
|-----------------------------------|-------------|--------------|------------|--------------|------------------|------------------|
| <b>Patient status (%)</b>         | <b>1639</b> | <b>69.2%</b> | <b>728</b> | <b>30.8%</b> |                  |                  |
| <b>HIV</b>                        |             |              |            |              |                  |                  |
| Negative                          | 1,330       | 81.1%        | 538        | 73.9%        | 1.00             | <b>&lt;0.001</b> |
| Positive                          | 309         | 18.9%        | 190        | 26.1%        | 1.45 (1.23-1.72) |                  |
| <b>Age at diagnosis in years</b>  |             |              |            |              |                  |                  |
| <40                               | 217         | 13.4%        | 109        | 15.0%        | 1.00             | <b>0.001</b>     |
| 40-49                             | 408         | 24.9%        | 160        | 22.0%        | 0.79 (0.62-1.00) |                  |
| 50-59                             | 402         | 24.6%        | 155        | 21.3%        | 0.82 (0.64-1.04) |                  |
| 60-69                             | 362         | 21.8%        | 137        | 18.8%        | 0.76 (0.58-0.76) |                  |
| ≥70                               | 250         | 15.3%        | 167        | 22.9%        | 1.18 (0.92-1.50) |                  |
| <b>Ethnicity</b>                  |             |              |            |              |                  |                  |
| Others                            | 385         | 23.5%        | 137        | 18.8%        | 1.00             | <b>&lt;0.001</b> |
| Black                             | 1,254       | 76.5%        | 591        | 81.2%        | 1.44 (1.20-1.74) |                  |
| <b>Highest level of education</b> |             |              |            |              |                  |                  |
| Primary education and below       | 412         | 25.3%        | 247        | 34.6%        | 1.00             | <b>&lt;0.001</b> |
| Secondary education and above     | 1,219       | 74.7%        | 466        | 65.4%        | 0.69 (0.59-0.81) |                  |
| <b>Wealth index</b>               |             |              |            |              |                  |                  |
| 1                                 | 312         | 19.0%        | 159        | 21.8%        | 1.38 (1.09-1.75) | <b>0.009</b>     |
| 2                                 | 322         | 19.6%        | 155        | 21.3%        | 1.35 (1.07-1.71) |                  |
| 3                                 | 311         | 19.0%        | 163        | 22.4%        | 1.46 (1.15-1.84) |                  |
| 4                                 | 351         | 21.4%        | 126        | 17.3%        | 1.08 (0.84-1.38) |                  |
| 5 (wealthiest)                    | 343         | 20.9%        | 125        | 17.2%        | 1.00             |                  |
| <b>Body mass index (BMI)</b>      |             |              |            |              |                  |                  |
| <25                               | 257         | 16.4%        | 154        | 22.5%        | 1.00             | <b>0.010</b>     |
| 25-29.9                           | 440         | 28.1%        | 155        | 22.6%        | 0.70 (0.56-0.87) |                  |
| ≥30                               | 871         | 55.5%        | 376        | 54.9%        | 0.82 (0.67-0.99) |                  |
| <b>Diabetes</b>                   |             |              |            |              |                  |                  |
| No                                | 1,428       | 87.2%        | 611        | 84.5%        | 1.00             | 0.075            |
| Yes                               | 209         | 12.8%        | 112        | 15.5%        | 1.17 (0.96-1.43) |                  |
| <b>Hypertension</b>               |             |              |            |              |                  |                  |
| No                                | 970         | 59.3%        | 413        | 57.1%        | 1.00             | 0.332            |
| Yes                               | 667         | 40.7%        | 310        | 42.9%        | 1.05 (0.90-1.21) |                  |
| <b>Cerebrovascular disease</b>    |             |              |            |              |                  |                  |
| No                                | 1,549       | 94.6%        | 664        | 91.8%        | 1.00             | <b>0.010</b>     |
| Yes                               | 88          | 5.4%         | 59         | 8.2%         | 1.44 (1.10-1.89) |                  |
| <b><sup>a</sup> ECOG PS</b>       |             |              |            |              |                  |                  |
| 0 & 1                             | 1,579       | 96.5%        | 643        | 88.7%        | 1.00             | <b>&lt;0.001</b> |
| 2-4                               | 57          | 3.5%         | 82         | 11.3%        | 2.81 (2.23-3.54) |                  |
| <b>Hospitals</b>                  |             |              |            |              |                  |                  |
| Durban                            | 275         | 16.8%        | 124        | 17.0%        | 1.00             | 0.332            |
| CHBAH                             | 648         | 39.5%        | 276        | 37.9%        | 1.14 (0.93-1.41) |                  |
| CMJAH                             | 419         | 25.6%        | 185        | 25.4%        | 1.16 (0.93-1.46) |                  |

|                               |       |       |     |       |                  |                  |
|-------------------------------|-------|-------|-----|-------|------------------|------------------|
| Greys                         | 273   | 16.7% | 118 | 16.2% | 1.00 (0.78-1.29) |                  |
| Ngwelezana                    | 24    | 1.5%  | 25  | 3.4%  | 1.47 (0.96-2.27) |                  |
| <b>Stage at diagnosis</b>     |       |       |     |       |                  |                  |
| I & II                        | 976   | 59.5% | 214 | 29.4% | 1.00             | <b>&lt;0.001</b> |
| III                           | 663   | 40.5% | 514 | 70.6% | 3.04 (2.59-3.56) |                  |
| <b>Histological diagnosis</b> |       |       |     |       |                  |                  |
| Invasive ductal               | 1,574 | 96.0% | 691 | 94.9% | 1.00             | 0.217            |
| Other histological type       | 65    | 4.0%  | 37  | 5.1%  | 1.12 (0.81-1.56) |                  |
| <b>Grade at diagnosis</b>     |       |       |     |       |                  |                  |
| 1 & 2                         | 959   | 67.4% | 313 | 51.6% | 1.00             | <b>&lt;0.001</b> |
| 3                             | 464   | 32.6% | 294 | 48.4% | 1.79 (1.53-2.10) |                  |
| <b>ER/PR status</b>           |       |       |     |       |                  |                  |
| Positive                      | 1,326 | 80.9% | 518 | 71.2% | 1.00             | <b>&lt;0.001</b> |
| Negative                      | 313   | 19.1% | 210 | 28.8% | 1.66 (1.41-1.95) |                  |
| <b>HER2 status</b>            |       |       |     |       |                  |                  |
| Negative                      | 1,271 | 77.5% | 538 | 73.9% | 1.00             | 0.060            |
| Positive                      | 368   | 22.5% | 190 | 26.1% | 1.20 (1.02-1.42) |                  |
| <b>Breast cancer subtype</b>  |       |       |     |       |                  |                  |
| <sup>b</sup> ER+/PR+; HER2-   | 1,049 | 64.0% | 385 | 52.9% | 1.00             | <b>&lt;0.001</b> |
| ER+/PR+; HER2+                | 277   | 16.9% | 133 | 18.3% | 1.27 (1.05-1.55) |                  |
| ER-/PR-; HER2+                | 91    | 5.6%  | 57  | 7.8%  | 1.68 (1.27-2.22) |                  |
| ER-/PR-; HER2-                | 222   | 13.5% | 153 | 21.0% | 1.79 (1.48-2.15) |                  |
| <b>KI67</b>                   |       |       |     |       |                  |                  |
| <20                           | 537   | 33.9% | 174 | 25.1% | 1.00             | <b>&lt;0.001</b> |
| ≥20                           | 1,047 | 66.1% | 520 | 74.9% | 1.49 (1.25-1.77) |                  |
| <b>Radiation therapy</b>      |       |       |     |       |                  |                  |
| No                            | 715   | 43.6% | 426 | 58.5% | 1.00             | <b>&lt;0.001</b> |
| Yes                           | 924   | 56.4% | 302 | 41.5% | 0.48 (0.41-0.56) |                  |
| <b>Treatment received</b>     |       |       |     |       |                  |                  |
| Surgery + chemotherapy        | 1,119 | 68.3% | 334 | 45.9% | 1.00             | <b>&lt;0.001</b> |
| Surgery, no chemotherapy      | 282   | 17.2% | 61  | 8.4%  | 0.80 (0.61-1.05) |                  |
| Chemotherapy, no surgery      | 115   | 7.0%  | 189 | 26.0% | 4.93 (4.11-5.91) |                  |
| No surgery or chemotherapy    | 123   | 7.5%  | 144 | 19.8% | 4.20 (3.45-5.11) |                  |

Abbreviations: <sup>a</sup> ECOG (Eastern Cooperative Oncology Group) PS (Performance status), <sup>b</sup> ER/PR (Oestrogen receptor/progesterone), HER2 (Human Epidermal Growth Factor Receptor 2), Missing data: Highest level of education (n=23), BMI (n=114), Diabetes (n=7), hypertension (n=7), cerebrovascular disease (n=7), ECOG (n=6), Grade (n=337), Ki67 (n=89)

### Supplementary table 3

#### Multivariate Cox Proportional Hazard Ratio Model of Risk Factors for Mortality in Women with Stages I-III Breast Cancer who received surgery and some form of systemic therapy

|                                   | Hazard ratio (95% CI) | P-value          |
|-----------------------------------|-----------------------|------------------|
| <b>HIV</b>                        |                       |                  |
| Negative                          | 1.00 (Reference)      |                  |
| Positive                          | 1.41 (1.07-1.85)      | <b>0.016</b>     |
| <b>Age at diagnosis in years</b>  |                       |                  |
| <40                               | 1.00 (Reference)      |                  |
| 40-49                             | 1.10 (0.78-1.56)      | 0.589            |
| 50-59                             | 0.94 (0.64-1.36)      | 0.730            |
| 60-69                             | 0.72 (0.48-1.09)      | 0.122            |
| ≥70                               | 1.43 (0.93-2.19)      | 0.101            |
| <b>Ethnicity</b>                  |                       |                  |
| Others                            | 1.00 (Reference)      |                  |
| Black                             | 1.21 (0.92-1.59)      | 0.180            |
| <b>Highest level of education</b> |                       |                  |
| Primary education and below       | 1.00 (Reference)      |                  |
| Secondary education and above     | 0.66 (0.51-0.84)      | <b>0.001</b>     |
| <b>Body mass index (BMI)</b>      |                       |                  |
| <25                               | 1.00 (Reference)      |                  |
| 25-29.9                           | 0.73 (0.53-1.01)      | 0.062            |
| ≥30                               | 0.95 (0.72-1.26)      | 0.716            |
| <b><sup>a</sup> ECOG</b>          |                       |                  |
| 0 & 1                             | 1.00 (Reference)      |                  |
| 2-4                               | 2.42 (1.52-3.83)      | <b>&lt;0.001</b> |
| <b>Stage at diagnosis</b>         |                       |                  |
| I & II                            | 1.00 (Reference)      |                  |
| III                               | 2.18 (1.74-2.72)      | <b>&lt;0.001</b> |
| <b>Breast cancer subtype</b>      |                       |                  |
| <sup>b</sup> ER+/PR+/HER2-        | 1.00 (Reference)      |                  |
| ER+/PR+/HER2+                     | 1.14 (0.85-1.52)      | 0.380            |
| ER-/PR-/HER2+                     | 1.53 (1.01-2.33)      | <b>0.046</b>     |
| ER-/PR-/HER2-                     | 1.54 (1.17-2.03)      | <b>0.002</b>     |
| <b>KI67</b>                       |                       |                  |
| <20                               | 1.00 (Reference)      |                  |
| ≥20                               | 1.31 (1.02-1.68)      | <b>0.002</b>     |
| <b>Treatment received</b>         |                       |                  |
| Surgery + chemotherapy            | 1.00 (Reference)      |                  |
| Surgery, no chemotherapy          | 0.97 (0.69-1.37)      | 0.878            |

Abbreviations: <sup>a</sup> ECOG (Eastern Cooperative Oncology Group), <sup>b</sup> ER/PR (Oestrogen receptor/Progesterone receptor), HER2 (Human Epidermal Growth Factor Receptor 2).

## Supplementary table 4

### Multivariate Cox Proportional Hazard Ratio Model of Risk Factors for Mortality in WLWH with Stages I-III Breast Cancer Enrolled in the SABCHO cohort

|                                   | Died, N=190<br>(row %) | Hazard ratio (95% CI) | P-value          |
|-----------------------------------|------------------------|-----------------------|------------------|
| <b>Age at diagnosis in years</b>  |                        |                       |                  |
| <40                               | 51 (39.8)              | 1.00 (Reference)      |                  |
| 40-49                             | 70 (33.5)              | 0.76 (0.50-1.15)      | 0.195            |
| 50-59                             | 53 (45.7)              | 1.00 (0.60-1.66)      | 0.997            |
| 60-69                             | 11 (30.6)              | 0.83 (0.39-1.78)      | 0.631            |
| ≥70                               | 5 (50.0)               | 1.55 (0.48-5.02)      | 0.468            |
| <b>Highest level of education</b> |                        |                       |                  |
| Primary education and below       | 46 (45.5)              | 1.00 (Reference)      |                  |
| Secondary education and above     | 141 (35.9)             | 0.72 (0.48-1.10)      | 0.135            |
| <b>Body mass index (BMI)</b>      |                        |                       |                  |
| <25                               | 62 (47.3)              | 1.00 (Reference)      |                  |
| 25-29.9                           | 44 (31.9)              | 0.69 (0.44-1.09)      | 0.113            |
| ≥30                               | 71 (34.0)              | 0.87 (0.59-1.28)      | 0.473            |
| <b><sup>a</sup> ECOG PS</b>       |                        |                       |                  |
| 0 & 1                             | 181 (37.4)             | 1.00 (Reference)      |                  |
| 2-4                               | 8 (57.1)               | 1.93 (0.81-4.59)      | 0.138            |
| <b>Stage at diagnosis</b>         |                        |                       |                  |
| I & II                            | 56 (24.5)              | 1.00 (Reference)      |                  |
| III                               | 134 (49.6)             | 2.24 (1.53-3.28)      | <b>&lt;0.001</b> |
| <b>Breast cancer subtype</b>      |                        |                       |                  |
| <b><sup>b</sup> ER+/PR+/HER2-</b> | 84 (31.0)              | 1.00 (Reference)      |                  |
| ER+/PR+/HER2+                     | 49 (44.1)              | 1.49 (0.99-2.25)      | 0.057            |
| ER-/PR-/HER2+                     | 15 (48.4)              | 1.39 (0.72-2.25)      | 0.328            |
| ER-/PR-/HER2-                     | 42 (48.8)              | 2.14 (1.37-3.36)      | <b>0.001</b>     |
| <b>KI67</b>                       |                        |                       |                  |
| <20                               | 36 (27.7)              | 1.00 (Reference)      |                  |
| ≥20                               | 145 (41.8)             | 1.57 (1.03-2.38)      | <b>0.036</b>     |
| <b>Treatment received</b>         |                        |                       |                  |
| Surgery + chemotherapy            | 93 (28.9)              | 1.00 (Reference)      |                  |
| Surgery, no chemotherapy          | 5 (12.5)               | 0.98 (0.37-2.56)      | 0.960            |
| Chemotherapy, no surgery          | 61 (68.5)              | 3.72 (2.53-5.46)      | <b>&lt;0.001</b> |
| No surgery or chemotherapy        | 31 (64.6)              | 6.96 (3.97-12.19)     | <b>&lt;0.001</b> |
| <b>ART use</b>                    |                        |                       |                  |
| HIV+, on ART                      | 141 (36.1)             | 1.00 (Reference)      |                  |
| HIV+, not on ART                  | 47 (46.1)              | 0.90 (0.57-1.42)      | 0.649            |
| <b>HIV viral load (copies/mL)</b> |                        |                       |                  |
| HIV+, VL < 50                     | 112 (35.7)             | 1.00 (Reference)      |                  |
| HIV+, VL ≥ 50                     | 70 (42.7)              | 1.06 (0.73-1.56)      | 0.751            |
| <b>CD4 count (cells/mL)</b>       |                        |                       |                  |
| HIV+, CD4 ≥ 200                   | 163 (37.8)             | 1.00 (Reference)      |                  |
| HIV+, CD4 < 200                   | 18 (42.9)              | 0.91 (0.52-1.62)      | 0.756            |

Abbreviations: <sup>a</sup> ECOG (Eastern Cooperative Oncology Group) PS (Performance status), <sup>b</sup> ER/PR (Oestrogen receptor/Progesterone receptor), HER2 (Human Epidermal Growth Factor Receptor 2), ART (Antiretroviral therapy), VL (Viral load). We tested for interactions

between HIV and each of the above covariates, and none was statistically significant. Missing data: Highest level of education (n=23), BMI (n=114), ECOG (n=6), Ki67 (n=89), ART use (n=2), HIV viral load (n=8), CD4 count (n=9).
